# Supplementary material for: High-Frequency Transcranial Random Noise Stimulation Modulates Gamma-Band EEG Source-Based Large-Scale Functional Network Connectivity in Patients with Schizophrenia: A Randomized, Double-Blind, Sham-Controlled Clinical Trial
Source: J Pers Med. 2022 Sep 30;12(10):1617. doi: 10.3390/jpm12101617 (PMC9605300; doi:10.3390/jpm12101617)
Supplement: Supplementary file 1 [file jpm-12-01617-s001.zip › Table S3.xlsx]

## Sheet: 84 BA1 - 複製
Brodmann areas	1L	2L	3L	4L	5L	6L	7L	8L	9L	10L	11L	13L	17L	18L	19L	20L	21L	22L	23L	24L	25L	27L	28L	29L	30L	31L	32L	33L	34L	35L	36L	37L	38L	39L	40L	41L	42L	43L	44L	45L	46L	47L	1R	2R	3R	4R	5R	6R	7R
1L	-	-1.86124	-2.3779	-2.28398	-2.25733	-2.20377	-1.88569	-2.49532	-2.11267	-2.05411	-2.12795	-2.11054	-2.00899	-1.93198	-2.06752	-2.33299	-2.31135	-2.14961	-2.01377	-2.37241	-2.24334	-2.31268	-2.32296	-2.21337	-2.06611	-1.88097	-2.63439	-2.71477	-2.4139	-2.33999	-2.19121	-2.64259	-2.3717	-2.13461	-1.70635	-2.19289	-2.18049	-2.05691	-2.04509	-2.42845	-2.40012	-1.96219	-2.42016	-2.25972	-2.34293	-2.42497	-2.66109	-2.87324	-2.13665
2L	-1.86124	-	-2.36397	-2.27995	-2.04063	-2.43133	-1.78611	-2.60718	-2.11023	-2.07259	-2.04003	-1.97871	-1.80235	-1.7262	-1.96517	-2.21953	-2.17309	-2.07499	-1.95194	-2.41744	-2.07213	-1.9956	-2.21859	-1.95113	-2.05365	-1.75533	-2.6048	-2.64731	-2.32169	-2.35791	-2.07514	-2.16397	-2.22368	-1.8408	-1.78407	-2.24414	-1.90483	-1.96526	-2.09329	-2.39111	-2.3858	-1.94908	-2.38392	-2.28211	-2.49431	-2.53154	-2.41489	-2.77014	-2.32535
3L	-2.3779	-2.36397	-	-2.49027	-2.61594	-2.75706	-2.17678	-2.02981	-2.27392	-2.12376	-2.0316	-1.64416	-2.06126	-2.05877	-2.11754	-1.85807	-1.66317	-2.36245	-1.81515	-2.2364	-2.13227	-1.63178	-2.05705	-1.82017	-1.89776	-1.8073	-2.63926	-2.49841	-1.98926	-1.70554	-1.62827	-2.41597	-2.24288	-2.17891	-1.85583	-1.83383	-1.96301	-1.58686	-2.2292	-2.351	-2.18143	-1.92561	-2.36287	-2.33708	-2.40249	-2.45393	-2.59542	-2.89453	-2.4235
4L	-2.28398	-2.27995	-2.49027	-	-2.56362	-2.62392	-2.32746	-1.66758	-1.70567	-2.10842	-2.07022	-1.56194	-2.18301	-2.18421	-2.18166	-1.63514	-1.60679	-1.9502	-1.90254	-2.1008	-1.86778	-1.6086	-1.83362	-1.66331	-1.78709	-1.96297	-2.45825	-2.41564	-1.83594	-1.57675	-1.56135	-1.92029	-2.29788	-1.94565	-1.68478	-1.55889	-2.16491	-1.54167	-2.20586	-2.39	-2.25831	-1.91511	-2.14616	-2.25668	-2.2091	-2.30462	-2.52974	-2.83181	-2.41704
5L	-2.25733	-2.04063	-2.61594	-2.56362	-	-2.78144	-2.38384	-2.519	-2.33995	-2.40488	-2.27623	-1.73867	-2.10448	-2.14752	-2.13465	-1.97279	-1.82239	-1.91679	-2.22051	-3.14225	-2.21196	-1.63548	-2.16114	-2.24616	-2.40123	-2.10704	-2.52661	-2.5046	-2.23767	-1.85095	-1.7301	-2.0971	-1.98364	-1.84563	-1.84935	-1.94185	-1.81594	-1.7571	-1.85094	-2.20069	-1.86645	-1.68659	-2.32918	-2.13611	-2.39467	-2.40516	-2.60962	-1.98837	-2.38784
6L	-2.20377	-2.43133	-2.75706	-2.62392	-2.78144	-	-2.37785	-2.12673	-1.70345	-2.05547	-2.03409	-1.67242	-2.24676	-2.19113	-2.57148	-1.48882	-1.93204	-1.53063	-2.57832	-2.59669	-1.76338	-1.98624	-1.63339	-1.87398	-2.34292	-2.42235	-2.11969	-1.8303	-1.67497	-1.7274	-1.81634	-1.79103	-2.00999	-1.99356	-1.67002	-1.54726	-1.62926	-1.75415	-1.81551	-2.2324	-2.19533	-1.84822	-2.44152	-2.4263	-2.71764	-2.83632	-2.54653	-2.10096	-2.47356
7L	-1.88569	-1.78611	-2.17678	-2.32746	-2.38384	-2.37785	-	-1.86613	-1.77555	-2.12832	-1.75179	-1.70824	-1.7201	-1.82442	-1.74094	-1.6823	-1.70585	-1.73642	-1.86321	-2.67847	-1.77638	-1.77612	-2.04797	-1.94865	-1.87788	-1.98005	-2.31239	-2.1927	-2.10657	-1.64975	-1.60958	-1.58597	-1.95	-1.54608	-1.65832	-1.73119	-1.74044	-1.65443	-1.8693	-2.25926	-1.90388	-1.79435	-1.3445	-1.40352	-1.35632	-1.40969	-2.46699	-2.26668	-2.05949
8L	-2.49532	-2.60718	-2.02981	-1.66758	-2.519	-2.12673	-1.86613	-	-1.86715	-1.95547	-1.93561	-1.57719	-2.26812	-1.94651	-2.44232	-1.80786	-1.79849	-2.55071	-2.02003	-2.02343	-2.1827	-1.84093	-1.73203	-1.93028	-2.03149	-2.12673	-2.34996	-2.4434	-1.79861	-1.7002	-1.75429	-2.96358	-1.91382	-2.82027	-2.49004	-1.93569	-2.29089	-1.59463	-2.11664	-2.10768	-2.0237	-2.06823	-2.34067	-2.27824	-2.44254	-2.55369	-2.5378	-2.90748	-1.55527
9L	-2.11267	-2.11023	-2.27392	-1.70567	-2.33995	-1.70345	-1.77555	-1.86715	-	-1.74063	-1.72894	-1.41855	-1.81065	-1.7555	-2.38615	-1.58376	-1.75752	-1.77944	-1.78723	-2.49467	-1.66146	-1.72717	-1.75425	-2.24098	-2.24951	-1.91099	-2.07136	-2.13781	-1.61133	-1.60983	-1.69465	-2.37485	-1.80682	-2.19863	-2.2388	-1.54643	-1.94148	-1.44937	-1.78407	-1.735	-1.71215	-1.8068	-2.47639	-2.35945	-2.534	-2.62529	-2.25283	-2.59409	-1.69175
10L	-2.05411	-2.07259	-2.12376	-2.10842	-2.40488	-2.05547	-2.12832	-1.95547	-1.74063	-	-1.57234	-1.76763	-2.00837	-2.06345	-2.26735	-1.68901	-1.89248	-1.69037	-2.39201	-1.95717	-1.37798	-2.00001	-1.41178	-1.93213	-2.05206	-2.19089	-2.11136	-2.11531	-1.55178	-1.68267	-1.85608	-2.56522	-1.76326	-2.38532	-1.77866	-1.81567	-1.72392	-1.62453	-1.76086	-1.93157	-1.84439	-1.69291	-2.06864	-1.92374	-2.01845	-2.16996	-2.49643	-1.85575	-2.27848
11L	-2.12795	-2.04003	-2.0316	-2.07022	-2.27623	-2.03409	-1.75179	-1.93561	-1.72894	-1.57234	-	-1.62723	-2.1692	-2.1304	-2.27622	-1.42359	-1.9394	-1.71975	-1.80902	-1.9946	-1.31053	-1.85566	-1.38074	-1.99863	-2.08241	-1.81087	-1.9634	-1.93964	-1.33094	-1.61436	-1.64944	-2.6718	-1.4798	-2.26004	-1.78396	-1.74189	-1.77728	-1.69389	-1.71742	-1.89825	-1.77674	-1.54927	-2.04825	-1.86888	-2.0757	-2.20025	-2.44131	-1.95075	-1.67016
13L	-2.11054	-1.97871	-1.64416	-1.56194	-1.73867	-1.67242	-1.70824	-1.57719	-1.41855	-1.76763	-1.62723	-	-2.16238	-2.1158	-2.11486	-1.45398	-1.92331	-1.64305	-1.63218	-1.87637	-1.49104	-1.64996	-1.50361	-1.55062	-1.86407	-1.79822	-2.09784	-1.88861	-1.70218	-1.63806	-2.05076	-1.58866	-1.67628	-1.8132	-1.77253	-1.52325	-1.87212	-1.80486	-2.05955	-1.96623	-1.6293	-1.64692	-1.84041	-2.01618	-1.81649	-1.86003	-2.19078	-2.05417	-1.72958
17L	-2.00899	-1.80235	-2.06126	-2.18301	-2.10448	-2.24676	-1.7201	-2.26812	-1.81065	-2.00837	-2.1692	-2.16238	-	-1.44027	-1.70882	-1.78102	-1.90705	-1.99038	-1.98494	-2.06052	-2.31742	-2.05744	-1.92076	-1.27911	-1.43885	-1.59005	-2.9966	-3.02372	-2.26365	-1.81185	-1.86149	-1.44281	-2.00044	-1.69616	-1.75811	-1.60608	-2.23399	-2.12815	-2.23696	-2.22113	-2.43931	-2.21565	-2.0523	-1.95413	-2.1483	-2.22453	-2.3072	-2.66519	-2.07524
18L	-1.93198	-1.7262	-2.05877	-2.18421	-2.14752	-2.19113	-1.82442	-1.94651	-1.7555	-2.06345	-2.1304	-2.1158	-1.44027	-	-1.57484	-1.75617	-1.85363	-1.94797	-2.03598	-2.1545	-2.12177	-1.87436	-1.82503	-1.20593	-1.35293	-1.84613	-2.85277	-2.96831	-2.20213	-1.67728	-1.70787	-1.41605	-2.04586	-1.45794	-1.50461	-1.60212	-2.14222	-2.14167	-2.28064	-2.28524	-2.44197	-2.14056	-2.1462	-1.99544	-2.16212	-2.22755	-2.30274	-2.72407	-2.07211
19L	-2.06752	-1.96517	-2.11754	-2.18166	-2.13465	-2.57148	-1.74094	-2.44232	-2.38615	-2.26735	-2.27622	-2.11486	-1.70882	-1.57484	-	-2.08316	-2.05179	-2.01647	-1.81277	-1.95819	-2.32737	-1.97365	-2.39877	-1.93806	-1.55354	-1.71915	-2.79827	-2.68856	-2.35594	-2.08123	-1.94236	-2.27568	-2.36802	-1.85119	-1.56326	-2.10265	-1.98703	-2.01662	-2.38645	-2.46433	-2.60672	-2.43683	-2.12947	-2.0279	-2.08055	-2.13368	-2.53644	-2.52355	-2.2153
20L	-2.33299	-2.21953	-1.85807	-1.63514	-1.97279	-1.48882	-1.6823	-1.80786	-1.58376	-1.68901	-1.42359	-1.45398	-1.78102	-1.75617	-2.08316	-	-2.40845	-2.17395	-1.90159	-2.00359	-1.58577	-1.97016	-1.86991	-2.02091	-2.13194	-1.79059	-2.13294	-1.92788	-1.7152	-2.06979	-2.15204	-1.95202	-1.44645	-1.94016	-1.93173	-2.16	-2.13286	-1.68807	-1.8947	-2.0395	-1.69454	-1.55014	-1.54499	-1.70124	-1.53449	-1.57419	-2.10176	-2.08454	-1.76545
21L	-2.31135	-2.17309	-1.66317	-1.60679	-1.82239	-1.93204	-1.70585	-1.79849	-1.75752	-1.89248	-1.9394	-1.92331	-1.90705	-1.85363	-2.05179	-2.40845	-	-2.33753	-1.78782	-1.96616	-2.00416	-2.16855	-2.67807	-2.01761	-2.22819	-2.08149	-2.29709	-2.34756	-2.12611	-2.48446	-2.45309	-1.83938	-1.91867	-2.16194	-1.80842	-2.39953	-2.36555	-2.11355	-2.0325	-1.89401	-1.76389	-2.06148	-1.59847	-1.64532	-1.51893	-1.57508	-2.11486	-2.32097	-1.83591
22L	-2.14961	-2.07499	-2.36245	-1.9502	-1.91679	-1.53063	-1.73642	-2.55071	-1.77944	-1.69037	-1.71975	-1.64305	-1.99038	-1.94797	-2.01647	-2.17395	-2.33753	-	-1.7121	-1.82187	-1.91229	-1.85422	-2.10703	-2.39915	-2.34552	-1.72059	-2.16081	-2.13853	-2.03277	-1.87518	-1.95788	-2.423	-1.75893	-2.11253	-1.87937	-2.0258	-2.09094	-1.58497	-2.01937	-2.38528	-2.13899	-1.84095	-1.90045	-2.14618	-1.99234	-2.08163	-2.28901	-1.81525	-1.84844
23L	-2.01377	-1.95194	-1.81515	-1.90254	-2.22051	-2.57832	-1.86321	-2.02003	-1.78723	-2.39201	-1.80902	-1.63218	-1.98494	-2.03598	-1.81277	-1.90159	-1.78782	-1.7121	-	-2.42159	-1.86473	-1.87365	-1.69604	-1.59632	-1.70922	-1.60114	-2.49357	-2.35687	-2.09401	-1.95662	-1.86785	-1.6414	-1.94722	-1.92859	-2.05648	-1.82889	-1.65708	-1.56817	-2.10012	-2.00413	-2.24729	-2.13883	-1.4403	-1.67274	-1.53202	-1.61659	-2.08895	-1.8012	-1.96152
24L	-2.37241	-2.41744	-2.2364	-2.1008	-3.14225	-2.59669	-2.67847	-2.02343	-2.49467	-1.95717	-1.9946	-1.87637	-2.06052	-2.1545	-1.95819	-2.00359	-1.96616	-1.82187	-2.42159	-	-2.14952	-1.65655	-1.94158	-1.85589	-1.91596	-2.2295	-2.47531	-2.17639	-2.10359	-2.08137	-1.92322	-2.15692	-1.93145	-2.22537	-2.24031	-1.95845	-1.8532	-1.86958	-1.95677	-2.09604	-2.05872	-2.00338	-2.74897	-2.69338	-2.76361	-2.85391	-3.20641	-1.92823	-2.09713
25L	-2.24334	-2.07213	-2.13227	-1.86778	-2.21196	-1.76338	-1.77638	-2.1827	-1.66146	-1.37798	-1.31053	-1.49104	-2.31742	-2.12177	-2.32737	-1.58577	-2.00416	-1.91229	-1.86473	-2.14952	-	-2.21162	-1.53119	-2.23381	-2.22834	-2.06842	-1.96736	-1.96581	-1.38029	-1.78108	-1.94945	-2.94441	-1.65059	-2.70025	-1.74236	-2.06326	-1.93582	-1.58223	-1.81971	-1.96494	-1.78905	-1.55119	-2.02432	-1.97249	-2.20081	-2.39456	-2.48916	-2.08416	-1.5975
27L	-2.31268	-1.9956	-1.63178	-1.6086	-1.63548	-1.98624	-1.77612	-1.84093	-1.72717	-2.00001	-1.85566	-1.64996	-2.05744	-1.87436	-1.97365	-1.97016	-2.16855	-1.85422	-1.87365	-1.65655	-2.21162	-	-1.73932	-1.86999	-2.29581	-1.89962	-2.47767	-1.77418	-1.76615	-1.94501	-2.12892	-2.53205	-2.04324	-1.76746	-1.55598	-1.97031	-2.08144	-1.78328	-1.80398	-2.16308	-2.27947	-2.25434	-1.89061	-1.89914	-1.8574	-1.88224	-1.85909	-2.47912	-1.44752
28L	-2.32296	-2.21859	-2.05705	-1.83362	-2.16114	-1.63339	-2.04797	-1.73203	-1.75425	-1.41178	-1.38074	-1.50361	-1.92076	-1.82503	-2.39877	-1.86991	-2.67807	-2.10703	-1.69604	-1.94158	-1.53119	-1.73932	-	-1.86807	-2.18421	-1.80208	-1.91246	-2.04142	-1.23876	-1.51163	-1.64765	-2.57719	-1.52394	-2.06787	-1.99374	-2.43469	-2.35156	-1.72697	-1.77759	-1.82353	-1.77742	-1.40657	-1.93512	-2.10127	-1.88023	-1.95874	-2.51873	-1.82126	-1.69065
29L	-2.21337	-1.95113	-1.82017	-1.66331	-2.24616	-1.87398	-1.94865	-1.93028	-2.24098	-1.93213	-1.99863	-1.55062	-1.27911	-1.20593	-1.93806	-2.02091	-2.01761	-2.39915	-1.59632	-1.85589	-2.23381	-1.86999	-1.86807	-	-1.5749	-1.76895	-2.42367	-2.68519	-1.99284	-1.74954	-2.01005	-2.40051	-1.8972	-1.92715	-2.17067	-2.77374	-2.2118	-1.69301	-1.90629	-1.89929	-2.26096	-2.18194	-1.78637	-1.65908	-1.85386	-1.92997	-2.683	-2.33659	-1.54202
30L	-2.06611	-2.05365	-1.89776	-1.78709	-2.40123	-2.34292	-1.87788	-2.03149	-2.24951	-2.05206	-2.08241	-1.86407	-1.43885	-1.35293	-1.55354	-2.13194	-2.22819	-2.34552	-1.70922	-1.91596	-2.22834	-2.29581	-2.18421	-1.5749	-	-1.7418	-2.58399	-2.67825	-2.11481	-2.12992	-2.22345	-2.38531	-2.14128	-1.74409	-1.8112	-2.4649	-2.12554	-1.90361	-2.11923	-2.1534	-2.49901	-2.26069	-1.86143	-1.86823	-1.8483	-1.93122	-2.93653	-2.98845	-1.998
31L	-1.88097	-1.75533	-1.8073	-1.96297	-2.10704	-2.42235	-1.98005	-2.12673	-1.91099	-2.19089	-1.81087	-1.79822	-1.59005	-1.84613	-1.71915	-1.79059	-2.08149	-1.72059	-1.60114	-2.2295	-2.06842	-1.89962	-1.80208	-1.76895	-1.7418	-	-2.63077	-2.37033	-2.19903	-1.73009	-1.82831	-1.83329	-2.08724	-1.74071	-1.99683	-1.75734	-1.71912	-1.78272	-1.81829	-1.99699	-2.35527	-2.25759	-1.36397	-1.43431	-1.36473	-1.44502	-2.01014	-2.05607	-2.02782
32L	-2.63439	-2.6048	-2.63926	-2.45825	-2.52661	-2.11969	-2.31239	-2.34996	-2.07136	-2.11136	-1.9634	-2.09784	-2.9966	-2.85277	-2.79827	-2.13294	-2.29709	-2.16081	-2.49357	-2.47531	-1.96736	-2.47767	-1.91246	-2.42367	-2.58399	-2.63077	-	-2.04634	-2.14809	-2.20131	-2.4646	-2.98877	-2.06728	-2.90379	-2.31622	-2.16341	-2.34528	-2.07826	-1.95338	-2.15707	-2.09717	-2.01505	-2.47425	-2.27015	-2.59415	-2.70918	-2.61184	-2.41863	-1.77141
33L	-2.71477	-2.64731	-2.49841	-2.41564	-2.5046	-1.8303	-2.1927	-2.4434	-2.13781	-2.11531	-1.93964	-1.88861	-3.02372	-2.96831	-2.68856	-1.92788	-2.34756	-2.13853	-2.35687	-2.17639	-1.96581	-1.77418	-2.04142	-2.68519	-2.67825	-2.37033	-2.04634	-	-2.10012	-1.92942	-2.12041	-2.68996	-2.13038	-2.52158	-2.34194	-1.97311	-2.43722	-1.92602	-1.99182	-2.21881	-2.08766	-2.04941	-2.28111	-2.13247	-2.51265	-2.71329	-2.77484	-2.01745	-2.05075
34L	-2.4139	-2.32169	-1.98926	-1.83594	-2.23767	-1.67497	-2.10657	-1.79861	-1.61133	-1.55178	-1.33094	-1.70218	-2.26365	-2.20213	-2.35594	-1.7152	-2.12611	-2.03277	-2.09401	-2.10359	-1.38029	-1.76615	-1.23876	-1.99284	-2.11481	-2.19903	-2.14809	-2.10012	-	-1.69984	-1.82295	-2.80754	-1.5762	-2.72521	-1.9233	-2.27607	-2.16145	-1.81179	-1.74588	-1.8885	-1.82812	-1.51275	-2.0697	-2.08389	-2.02301	-2.14283	-2.26429	-2.0832	-1.85663
35L	-2.33999	-2.35791	-1.70554	-1.57675	-1.85095	-1.7274	-1.64975	-1.7002	-1.60983	-1.68267	-1.61436	-1.63806	-1.81185	-1.67728	-2.08123	-2.06979	-2.48446	-1.87518	-1.95662	-2.08137	-1.78108	-1.94501	-1.51163	-1.74954	-2.12992	-1.73009	-2.20131	-1.92942	-1.69984	-	-2.07008	-2.21687	-1.71202	-1.78032	-1.82536	-2.27392	-1.90851	-1.90414	-2.12566	-1.89707	-1.77025	-1.66343	-1.67699	-1.79693	-1.6224	-1.63516	-1.92261	-2.59638	-1.42992
36L	-2.19121	-2.07514	-1.62827	-1.56135	-1.7301	-1.81634	-1.60958	-1.75429	-1.69465	-1.85608	-1.64944	-2.05076	-1.86149	-1.70787	-1.94236	-2.15204	-2.45309	-1.95788	-1.86785	-1.92322	-1.94945	-2.12892	-1.64765	-2.01005	-2.22345	-1.82831	-2.4646	-2.12041	-1.82295	-2.07008	-	-2.06758	-1.74173	-1.77051	-1.64094	-2.3112	-1.91887	-2.2489	-2.02148	-2.08158	-1.93556	-1.79583	-1.74	-1.78135	-1.62338	-1.63895	-1.82719	-2.41583	-1.41768
37L	-2.64259	-2.16397	-2.41597	-1.92029	-2.0971	-1.79103	-1.58597	-2.96358	-2.37485	-2.56522	-2.6718	-1.58866	-1.44281	-1.41605	-2.27568	-1.95202	-1.83938	-2.423	-1.6414	-2.15692	-2.94441	-2.53205	-2.57719	-2.40051	-2.38531	-1.83329	-2.98877	-2.68996	-2.80754	-2.21687	-2.06758	-	-2.47786	-2.2366	-1.90087	-1.62141	-2.39455	-1.62654	-2.5032	-2.87118	-2.79846	-2.62339	-1.63234	-1.84293	-1.68694	-1.7679	-2.60818	-2.48263	-1.65637
38L	-2.3717	-2.22368	-2.24288	-2.29788	-1.98364	-2.00999	-1.95	-1.91382	-1.80682	-1.76326	-1.4798	-1.67628	-2.00044	-2.04586	-2.36802	-1.44645	-1.91867	-1.75893	-1.94722	-1.93145	-1.65059	-2.04324	-1.52394	-1.8972	-2.14128	-2.08724	-2.06728	-2.13038	-1.5762	-1.71202	-1.74173	-2.47786	-	-2.09977	-1.75391	-1.89396	-1.80477	-1.84297	-1.85488	-1.87106	-1.68527	-1.63517	-2.28682	-2.15647	-2.20798	-2.28912	-2.39293	-2.04509	-2.09564
39L	-2.13461	-1.8408	-2.17891	-1.94565	-1.84563	-1.99356	-1.54608	-2.82027	-2.19863	-2.38532	-2.26004	-1.8132	-1.69616	-1.45794	-1.85119	-1.94016	-2.16194	-2.11253	-1.92859	-2.22537	-2.70025	-1.76746	-2.06787	-1.92715	-1.74409	-1.74071	-2.90379	-2.52158	-2.72521	-1.78032	-1.77051	-2.2366	-2.09977	-	-1.63881	-2.13686	-2.14324	-1.91711	-2.26498	-2.32214	-2.46854	-2.27666	-2.22929	-2.05562	-2.01358	-2.02014	-2.00869	-2.53312	-2.06354
40L	-1.70635	-1.78407	-1.85583	-1.68478	-1.84935	-1.67002	-1.65832	-2.49004	-2.2388	-1.77866	-1.78396	-1.77253	-1.75811	-1.50461	-1.56326	-1.93173	-1.80842	-1.87937	-2.05648	-2.24031	-1.74236	-1.55598	-1.99374	-2.17067	-1.8112	-1.99683	-2.31622	-2.34194	-1.9233	-1.82536	-1.64094	-1.90087	-1.75391	-1.63881	-	-1.7908	-1.71412	-1.79786	-1.82239	-2.08366	-2.11033	-1.62329	-2.28283	-2.16962	-2.29811	-2.28749	-2.1405	-2.29354	-2.20049
41L	-2.19289	-2.24414	-1.83383	-1.55889	-1.94185	-1.54726	-1.73119	-1.93569	-1.54643	-1.81567	-1.74189	-1.52325	-1.60608	-1.60212	-2.10265	-2.16	-2.39953	-2.0258	-1.82889	-1.95845	-2.06326	-1.97031	-2.43469	-2.77374	-2.4649	-1.75734	-2.16341	-1.97311	-2.27607	-2.27392	-2.3112	-1.62141	-1.89396	-2.13686	-1.7908	-	-2.00202	-1.41883	-2.50642	-2.18826	-1.7809	-2.06333	-1.57009	-1.79937	-1.56992	-1.62052	-2.26589	-1.87779	-2.07042
42L	-2.18049	-1.90483	-1.96301	-2.16491	-1.81594	-1.62926	-1.74044	-2.29089	-1.94148	-1.72392	-1.77728	-1.87212	-2.23399	-2.14222	-1.98703	-2.13286	-2.36555	-2.09094	-1.65708	-1.8532	-1.93582	-2.08144	-2.35156	-2.2118	-2.12554	-1.71912	-2.34528	-2.43722	-2.16145	-1.90851	-1.91887	-2.39455	-1.80477	-2.14324	-1.71412	-2.00202	-	-1.72669	-1.97982	-2.31538	-2.45133	-1.87019	-2.26778	-2.11761	-2.1049	-2.11946	-2.20314	-1.92048	-1.74364
43L	-2.05691	-1.96526	-1.58686	-1.54167	-1.7571	-1.75415	-1.65443	-1.59463	-1.44937	-1.62453	-1.69389	-1.80486	-2.12815	-2.14167	-2.01662	-1.68807	-2.11355	-1.58497	-1.56817	-1.86958	-1.58223	-1.78328	-1.72697	-1.69301	-1.90361	-1.78272	-2.07826	-1.92602	-1.81179	-1.90414	-2.2489	-1.62654	-1.84297	-1.91711	-1.79786	-1.41883	-1.72669	-	-2.01627	-1.90648	-1.58065	-1.80646	-1.83305	-1.9449	-1.77914	-1.81816	-2.14034	-2.08956	-1.95217
44L	-2.04509	-2.09329	-2.2292	-2.20586	-1.85094	-1.81551	-1.8693	-2.11664	-1.78407	-1.76086	-1.71742	-2.05955	-2.23696	-2.28064	-2.38645	-1.8947	-2.0325	-2.01937	-2.10012	-1.95677	-1.81971	-1.80398	-1.77759	-1.90629	-2.11923	-1.81829	-1.95338	-1.99182	-1.74588	-2.12566	-2.02148	-2.5032	-1.85488	-2.26498	-1.82239	-2.50642	-1.97982	-2.01627	-	-2.1795	-2.18366	-1.79488	-2.22798	-2.10479	-2.27395	-2.36763	-1.944	-2.07967	-2.0386
45L	-2.42845	-2.39111	-2.351	-2.39	-2.20069	-2.2324	-2.25926	-2.10768	-1.735	-1.93157	-1.89825	-1.96623	-2.22113	-2.28524	-2.46433	-2.0395	-1.89401	-2.38528	-2.00413	-2.09604	-1.96494	-2.16308	-1.82353	-1.89929	-2.1534	-1.99699	-2.15707	-2.21881	-1.8885	-1.89707	-2.08158	-2.87118	-1.87106	-2.32214	-2.08366	-2.18826	-2.31538	-1.90648	-2.1795	-	-2.06091	-1.95216	-2.22868	-2.12017	-2.26177	-2.40628	-2.02707	-2.12101	-2.00925
46L	-2.40012	-2.3858	-2.18143	-2.25831	-1.86645	-2.19533	-1.90388	-2.0237	-1.71215	-1.84439	-1.77674	-1.6293	-2.43931	-2.44197	-2.60672	-1.69454	-1.76389	-2.13899	-2.24729	-2.05872	-1.78905	-2.27947	-1.77742	-2.26096	-2.49901	-2.35527	-2.09717	-2.08766	-1.82812	-1.77025	-1.93556	-2.79846	-1.68527	-2.46854	-2.11033	-1.7809	-2.45133	-1.58065	-2.18366	-2.06091	-	-1.90872	-2.29124	-2.14997	-2.26431	-2.32862	-1.92066	-2.18316	-2.07979
47L	-1.96219	-1.94908	-1.92561	-1.91511	-1.68659	-1.84822	-1.79435	-2.06823	-1.8068	-1.69291	-1.54927	-1.64692	-2.21565	-2.14056	-2.43683	-1.55014	-2.06148	-1.84095	-2.13883	-2.00338	-1.55119	-2.25434	-1.40657	-2.18194	-2.26069	-2.25759	-2.01505	-2.04941	-1.51275	-1.66343	-1.79583	-2.62339	-1.63517	-2.27666	-1.62329	-2.06333	-1.87019	-1.80646	-1.79488	-1.95216	-1.90872	-	-2.15719	-2.0489	-2.0923	-2.22138	-1.82687	-1.94731	-1.80023
1R	-2.42016	-2.38392	-2.36287	-2.14616	-2.32918	-2.44152	-1.3445	-2.34067	-2.47639	-2.06864	-2.04825	-1.84041	-2.0523	-2.1462	-2.12947	-1.54499	-1.59847	-1.90045	-1.4403	-2.74897	-2.02432	-1.89061	-1.93512	-1.78637	-1.86143	-1.36397	-2.47425	-2.28111	-2.0697	-1.67699	-1.74	-1.63234	-2.28682	-2.22929	-2.28283	-1.57009	-2.26778	-1.83305	-2.22798	-2.22868	-2.29124	-2.15719	-	-1.54099	-1.84778	-1.91794	-2.39774	-2.34958	-1.47296
2R	-2.25972	-2.28211	-2.33708	-2.25668	-2.13611	-2.4263	-1.40352	-2.27824	-2.35945	-1.92374	-1.86888	-2.01618	-1.95413	-1.99544	-2.0279	-1.70124	-1.64532	-2.14618	-1.67274	-2.69338	-1.97249	-1.89914	-2.10127	-1.65908	-1.86823	-1.43431	-2.27015	-2.13247	-2.08389	-1.79693	-1.78135	-1.84293	-2.15647	-2.05562	-2.16962	-1.79937	-2.11761	-1.9449	-2.10479	-2.12017	-2.14997	-2.0489	-1.54099	-	-1.9947	-2.07103	-2.04597	-2.37777	-1.58291
3R	-2.34293	-2.49431	-2.40249	-2.2091	-2.39467	-2.71764	-1.35632	-2.44254	-2.534	-2.01845	-2.0757	-1.81649	-2.1483	-2.16212	-2.08055	-1.53449	-1.51893	-1.99234	-1.53202	-2.76361	-2.20081	-1.8574	-1.88023	-1.85386	-1.8483	-1.36473	-2.59415	-2.51265	-2.02301	-1.6224	-1.62338	-1.68694	-2.20798	-2.01358	-2.29811	-1.56992	-2.1049	-1.77914	-2.27395	-2.26177	-2.26431	-2.0923	-1.84778	-1.9947	-	-1.88202	-2.53093	-2.55283	-1.60065
4R	-2.42497	-2.53154	-2.45393	-2.30462	-2.40516	-2.83632	-1.40969	-2.55369	-2.62529	-2.16996	-2.20025	-1.86003	-2.22453	-2.22755	-2.13368	-1.57419	-1.57508	-2.08163	-1.61659	-2.85391	-2.39456	-1.88224	-1.95874	-1.92997	-1.93122	-1.44502	-2.70918	-2.71329	-2.14283	-1.63516	-1.63895	-1.7679	-2.28912	-2.02014	-2.28749	-1.62052	-2.11946	-1.81816	-2.36763	-2.40628	-2.32862	-2.22138	-1.91794	-2.07103	-1.88202	-	-2.53573	-2.60525	-1.57923
5R	-2.66109	-2.41489	-2.59542	-2.52974	-2.60962	-2.54653	-2.46699	-2.5378	-2.25283	-2.49643	-2.44131	-2.19078	-2.3072	-2.30274	-2.53644	-2.10176	-2.11486	-2.28901	-2.08895	-3.20641	-2.48916	-1.85909	-2.51873	-2.683	-2.93653	-2.01014	-2.61184	-2.77484	-2.26429	-1.92261	-1.82719	-2.60818	-2.39293	-2.00869	-2.1405	-2.26589	-2.20314	-2.14034	-1.944	-2.02707	-1.92066	-1.82687	-2.39774	-2.04597	-2.53093	-2.53573	-	-2.18063	-2.34453
6R	-2.87324	-2.77014	-2.89453	-2.83181	-1.98837	-2.10096	-2.26668	-2.90748	-2.59409	-1.85575	-1.95075	-2.05417	-2.66519	-2.72407	-2.52355	-2.08454	-2.32097	-1.81525	-1.8012	-1.92823	-2.08416	-2.47912	-1.82126	-2.33659	-2.98845	-2.05607	-2.41863	-2.01745	-2.0832	-2.59638	-2.41583	-2.48263	-2.04509	-2.53312	-2.29354	-1.87779	-1.92048	-2.08956	-2.07967	-2.12101	-2.18316	-1.94731	-2.34958	-2.37777	-2.55283	-2.60525	-2.18063	-	-2.17152
7R	-2.13665	-2.32535	-2.4235	-2.41704	-2.38784	-2.47356	-2.05949	-1.55527	-1.69175	-2.27848	-1.67016	-1.72958	-2.07524	-2.07211	-2.2153	-1.76545	-1.83591	-1.84844	-1.96152	-2.09713	-1.5975	-1.44752	-1.69065	-1.54202	-1.998	-2.02782	-1.77141	-2.05075	-1.85663	-1.42992	-1.41768	-1.65637	-2.09564	-2.06354	-2.20049	-2.07042	-1.74364	-1.95217	-2.0386	-2.00925	-2.07979	-1.80023	-1.47296	-1.58291	-1.60065	-1.57923	-2.34453	-2.17152	-
8R	-2.21343	-2.51229	-1.80396	-1.62365	-2.57805	-2.22495	-1.87216	-2.52989	-2.30146	-1.98178	-2.02709	-1.63007	-2.47858	-2.32675	-2.35537	-1.94223	-1.7994	-2.41631	-2.26828	-1.57435	-2.50308	-1.91759	-2.00445	-1.78951	-2.00484	-2.10082	-2.38174	-2.51388	-2.23156	-1.95213	-1.92966	-2.75657	-2.3985	-2.6904	-2.71655	-2.18499	-2.14205	-1.63673	-2.23242	-2.26397	-2.29218	-2.29728	-2.36088	-2.35384	-2.5374	-2.65208	-2.84616	-2.40961	-1.76343
9R	-2.77519	-2.87332	-2.21877	-2.01477	-2.80772	-2.06954	-2.75571	-2.15341	-2.33695	-2.02366	-1.97723	-2.13007	-2.88699	-2.92147	-3.27333	-2.24848	-2.50665	-2.41472	-2.67579	-1.66342	-2.22568	-2.40111	-2.21914	-3.49262	-3.3172	-2.6643	-2.24006	-2.07493	-2.26077	-2.34049	-2.55571	-2.54907	-2.25458	-2.66694	-2.80315	-2.53621	-2.46401	-2.16639	-2.13599	-2.2382	-2.29512	-2.20229	-2.2751	-2.4424	-2.49018	-2.55415	-2.80919	-1.84243	-2.61494
10R	-2.14292	-2.13705	-2.34232	-2.3381	-1.83863	-1.86573	-1.98908	-1.92436	-2.03794	-1.54538	-1.54402	-1.96366	-1.87719	-1.92062	-2.46674	-2.2266	-2.26105	-2.15001	-1.93746	-1.95893	-1.53954	-2.82696	-1.96335	-2.02835	-2.09475	-2.13729	-1.76774	-1.83829	-1.87546	-2.23005	-2.57661	-2.76782	-1.73384	-2.42508	-2.21761	-2.54304	-2.14995	-2.17814	-1.83301	-2.0257	-1.65899	-1.5613	-1.96469	-1.70478	-2.02856	-2.10964	-1.98422	-2.11194	-2.02652
11R	-2.22554	-2.2006	-2.47598	-2.37749	-1.9305	-1.78934	-2.06849	-2.06413	-2.14077	-1.61585	-1.59591	-2.07416	-2.1371	-2.12715	-2.41062	-2.04	-2.33114	-1.98477	-1.72775	-1.82112	-1.56604	-2.45377	-1.8037	-2.20148	-2.52556	-2.0407	-1.8506	-1.79951	-1.81261	-2.10196	-2.31458	-2.66805	-1.75819	-2.20586	-2.14039	-2.1737	-2.08221	-2.23048	-1.73905	-1.92146	-1.7481	-1.66748	-1.97593	-1.73262	-2.10192	-2.23019	-2.03532	-2.01581	-1.93698
13R	-2.32992	-2.29561	-2.1605	-2.31072	-1.97239	-1.78924	-1.96369	-2.30429	-2.51181	-1.86303	-1.73528	-1.90909	-2.42676	-2.65136	-2.50747	-1.77857	-2.17377	-1.54062	-1.7169	-1.75815	-1.67881	-2.45735	-1.4634	-2.17812	-2.92578	-2.06787	-2.01263	-1.92838	-1.76735	-2.25099	-2.34344	-2.41863	-1.77738	-2.23969	-2.03785	-1.6853	-1.74098	-2.1413	-1.75811	-2.00047	-2.13551	-2.01815	-1.85842	-1.77273	-1.90684	-1.93715	-2.55103	-1.996	-1.7304
17R	-2.49651	-2.17317	-2.55993	-2.62539	-2.30435	-2.43437	-1.7091	-2.68339	-2.0089	-2.1378	-2.31072	-2.2485	-1.88648	-1.93896	-1.86789	-1.95423	-2.01987	-2.30305	-2.32361	-2.65457	-2.42094	-2.27329	-2.07161	-1.62356	-1.71542	-1.80545	-3.08165	-3.32543	-2.31367	-1.98707	-1.96615	-1.78672	-1.89274	-2.22491	-1.85145	-1.80709	-2.33289	-2.096	-2.31743	-2.44592	-2.39539	-2.17384	-1.89511	-1.78682	-2.05854	-2.25044	-2.57357	-2.38118	-2.13681
18R	-2.55666	-2.16787	-2.87492	-2.72403	-2.73115	-2.5549	-1.84359	-2.89437	-2.46494	-2.14198	-2.3471	-2.25935	-1.83547	-1.87843	-1.92986	-2.02299	-2.0551	-2.41559	-2.44768	-3.05072	-2.44648	-2.27137	-2.09593	-1.75556	-1.79618	-1.93909	-3.04964	-3.40944	-2.32608	-2.04184	-2.00777	-1.99797	-1.89114	-2.28694	-2.06691	-1.99411	-2.35165	-2.12314	-2.3479	-2.46345	-2.34606	-2.11022	-1.88244	-1.72573	-2.0801	-2.23526	-2.64554	-2.40667	-2.13722
19R	-2.32851	-2.20654	-2.80726	-2.61582	-2.42555	-2.49072	-1.9873	-2.65365	-2.62214	-1.99063	-2.03791	-2.23497	-1.87667	-1.92365	-2.04288	-1.98763	-2.03721	-2.17561	-2.23148	-3.08054	-2.22194	-2.21921	-2.03481	-1.64764	-1.89128	-1.90084	-2.70102	-2.85761	-2.28721	-2.01241	-2.02602	-1.84188	-2.03733	-2.42656	-2.12201	-1.96895	-2.05841	-2.1494	-2.2647	-2.37224	-2.35588	-1.90731	-1.67759	-1.51141	-1.75045	-1.83974	-2.05402	-2.41752	-1.85517
20R	-2.43576	-2.3494	-2.24171	-2.13623	-2.40591	-2.60337	-2.06505	-2.1404	-2.20949	-1.74656	-1.67125	-1.94059	-2.04736	-2.00886	-2.27993	-1.93703	-1.9846	-1.88445	-1.84904	-2.15197	-1.74669	-1.9674	-1.55515	-1.60828	-2.17694	-1.96341	-1.69557	-1.54454	-1.77731	-1.97762	-2.16161	-1.93422	-1.85837	-1.66729	-1.99651	-1.89148	-2.03171	-1.91241	-2.20911	-2.13193	-2.10239	-1.62858	-1.34024	-1.27294	-1.5049	-1.62141	-2.45136	-2.38313	-1.76768
21R	-2.29742	-2.19449	-2.30571	-2.38406	-2.1079	-2.46307	-1.8388	-2.37863	-2.28458	-1.58622	-1.34501	-1.81033	-2.19835	-2.30202	-2.26536	-1.73034	-2.11973	-1.56292	-1.70846	-2.23231	-1.36929	-2.20115	-1.37861	-1.81667	-2.49679	-2.03049	-1.93487	-1.60456	-1.48242	-1.89158	-2.136	-1.95176	-1.57834	-1.69864	-1.84278	-1.64966	-1.69627	-2.00561	-1.9643	-2.05299	-2.01488	-1.46862	-1.67153	-1.53446	-1.65923	-1.78838	-2.32471	-2.23484	-1.62037
22R	-2.47827	-2.33181	-2.452	-2.34922	-2.39151	-2.42841	-1.6328	-2.31367	-2.16585	-2.1643	-1.7427	-1.80873	-2.05017	-1.98846	-1.94667	-1.85689	-1.61913	-2.08823	-2.05741	-1.98643	-2.1089	-1.78096	-1.96335	-1.98227	-1.91938	-1.82353	-1.78352	-1.71712	-1.8463	-1.80493	-1.75908	-2.23647	-2.07974	-2.16802	-2.23206	-1.99495	-1.97374	-1.76112	-1.81839	-2.26939	-2.02909	-1.67563	-1.50926	-1.37682	-1.55396	-1.65143	-2.43484	-2.0692	-1.83584
23R	-1.99023	-2.0154	-2.03755	-1.97455	-2.23708	-3.00996	-1.87784	-2.09672	-1.89466	-2.01887	-1.78628	-1.80697	-1.75697	-1.83756	-1.95998	-1.67786	-1.85549	-1.82392	-1.68678	-2.62505	-1.97797	-1.94138	-1.70901	-1.63264	-1.95455	-1.86626	-2.57437	-2.41358	-2.1585	-1.79623	-1.89654	-1.68702	-2.02961	-2.02058	-2.12907	-1.88722	-1.80058	-1.86393	-1.85767	-1.8116	-2.02922	-1.99448	-1.40556	-1.51599	-1.50386	-1.55338	-2.11642	-2.32571	-1.90539
24R	-2.5432	-2.61694	-2.22813	-2.18061	-2.31972	-2.49022	-2.73801	-2.01595	-2.5834	-2.18374	-2.11923	-2.11071	-2.42784	-2.54906	-2.28379	-2.20074	-2.06977	-1.91589	-2.30669	-1.6647	-2.29563	-1.868	-2.06562	-1.90947	-2.12046	-2.37245	-2.51262	-2.21251	-2.23217	-2.32503	-2.081	-2.4331	-2.15418	-2.71819	-2.39974	-2.13207	-1.97362	-2.08814	-2.2183	-2.32189	-2.2789	-2.09956	-2.26616	-2.62524	-2.2579	-2.25557	-3.32378	-2.07554	-2.0964
25R	-2.27912	-2.33946	-1.90421	-1.6872	-2.1445	-1.77911	-2.01731	-1.85839	-1.89579	-1.50693	-1.46516	-1.52171	-1.92237	-1.69587	-2.51925	-1.79768	-1.91079	-1.9306	-1.8892	-1.72035	-1.5684	-2.23568	-1.58317	-2.11861	-2.01837	-2.3102	-2.0554	-1.9806	-1.7138	-1.95526	-2.11352	-3.0901	-1.65582	-2.71771	-2.2264	-2.33832	-1.94995	-1.60752	-1.83728	-1.63476	-1.60866	-1.71018	-1.87813	-2.19957	-1.99965	-2.03945	-2.44373	-1.65623	-1.99479
27R	-2.11342	-2.20539	-1.82262	-1.7283	-2.2709	-2.11578	-1.78928	-1.97022	-2.19583	-1.87488	-1.76094	-1.9085	-1.87914	-1.66523	-1.91185	-1.96816	-1.92834	-2.35012	-2.26808	-2.46723	-1.83159	-2.0226	-1.80736	-1.8428	-1.77174	-1.9098	-2.17592	-2.50975	-1.89152	-1.94338	-1.92741	-2.29985	-1.87236	-2.38857	-2.20955	-2.32976	-2.25047	-1.94457	-2.00309	-1.98565	-2.16661	-1.86695	-1.25452	-1.28089	-1.46859	-1.58238	-1.88373	-2.43467	-1.61567
28R	-2.16665	-2.03555	-1.84243	-1.82804	-2.32762	-1.77049	-1.56668	-1.53597	-1.68412	-1.81509	-1.71691	-1.79608	-1.81721	-1.80139	-2.72704	-1.87599	-2.18986	-2.24413	-1.55764	-1.62688	-1.49239	-1.57133	-1.77087	-1.73304	-3.02432	-1.61811	-1.40607	-1.55165	-1.49903	-1.80154	-1.88815	-2.20175	-1.89319	-2.07731	-2.33291	-2.03579	-2.27792	-1.94864	-1.79903	-1.73619	-1.87553	-1.66556	-1.33282	-1.44068	-1.52841	-1.65177	-2.94581	-2.04607	-1.68096
29R	-1.99694	-1.93255	-1.92706	-1.76741	-2.12295	-2.09981	-2.04097	-1.74248	-1.83936	-1.98866	-1.81784	-1.99869	-1.47109	-1.39482	-2.28052	-2.08789	-1.95819	-2.28373	-1.78233	-1.99351	-2.04967	-1.70719	-1.83447	-1.49836	-2.1374	-1.90897	-2.34475	-2.26517	-1.96061	-1.76329	-1.93932	-1.87957	-1.84448	-2.20906	-2.18072	-2.47457	-2.29747	-2.0888	-1.97182	-1.88008	-2.19815	-2.07628	-1.57345	-1.42955	-1.7049	-1.75752	-2.09014	-2.17526	-1.62242
30R	-2.2326	-2.18261	-2.36156	-2.41819	-2.27538	-2.50306	-2.17114	-1.69391	-1.78425	-2.03011	-1.90896	-2.10117	-1.61671	-1.74932	-2.22312	-1.97809	-2.11744	-2.27563	-1.87924	-2.17762	-1.88156	-1.89933	-1.75039	-1.35509	-1.80628	-1.91539	-1.9577	-2.25326	-1.91471	-2.00262	-2.11449	-1.6275	-1.99856	-2.07688	-2.07568	-1.97895	-2.31852	-2.09537	-1.90248	-1.85621	-2.30106	-1.95373	-1.47334	-1.34517	-1.58193	-1.66192	-2.05735	-2.41961	-1.77311
31R	-2.153	-2.14765	-2.43905	-2.46427	-2.2945	-2.65081	-1.92115	-1.75078	-1.59715	-1.97178	-1.61384	-2.09681	-1.95459	-2.00109	-1.98928	-1.88267	-1.94365	-2.02487	-1.99382	-2.28077	-1.63671	-1.93714	-1.78409	-1.64926	-2.06771	-1.84528	-1.95443	-1.97955	-1.74742	-1.95042	-2.06312	-1.62427	-1.96506	-2.2062	-2.09371	-1.94797	-2.01642	-2.18884	-1.90514	-1.80579	-1.90889	-1.77454	-1.34474	-1.43224	-1.43491	-1.42708	-2.14061	-1.94856	-2.02072
32R	-2.75475	-2.69293	-2.52142	-2.28594	-2.45531	-2.03127	-2.45764	-2.32818	-2.22361	-2.23407	-2.08114	-1.91975	-2.98804	-2.96239	-2.94512	-2.28251	-2.152	-2.20596	-2.63361	-2.18351	-2.09414	-2.23391	-1.83696	-2.51896	-2.64081	-2.74597	-2.05939	-2.05008	-2.24721	-2.12488	-2.54172	-2.75304	-2.00896	-2.7835	-2.49688	-2.29941	-2.32938	-1.95237	-2.07296	-1.97556	-2.23407	-2.1241	-2.29273	-2.25904	-2.32506	-2.37019	-2.3641	-2.27242	-2.08382
33R	-2.87906	-2.81947	-2.64808	-2.53496	-2.50453	-1.89764	-2.34436	-2.59976	-2.33052	-2.2358	-2.08674	-2.00105	-3.03919	-3.06934	-2.71453	-2.05264	-2.44078	-2.26443	-2.43564	-2.01798	-2.16344	-1.89477	-2.07657	-2.81145	-2.75421	-2.42791	-2.10008	-1.90586	-2.22625	-2.01089	-2.24025	-2.73719	-2.20472	-2.51866	-2.59985	-2.18392	-2.50552	-2.03083	-2.09916	-2.20251	-2.17547	-2.14602	-2.32276	-2.17328	-2.53824	-2.72968	-2.59646	-1.97329	-2.27858
34R	-2.30213	-2.40383	-1.72287	-1.58666	-1.9598	-1.67662	-1.98252	-1.56527	-1.75039	-1.61229	-1.44623	-1.55981	-2.10683	-1.90946	-2.45912	-2.07749	-2.17994	-1.99051	-1.85173	-2.13594	-1.40861	-1.79437	-1.64832	-1.86172	-2.51321	-1.99407	-1.60647	-1.76377	-1.53146	-1.91728	-2.11228	-2.78108	-1.70414	-2.05057	-2.23298	-2.33561	-1.99534	-1.74362	-1.96189	-1.66873	-1.74392	-1.70318	-1.43518	-1.53196	-1.47918	-1.52344	-2.07974	-2.12331	-1.62856
35R	-2.1897	-2.1886	-1.94549	-1.81112	-2.37107	-2.01834	-1.80611	-2.19171	-2.2463	-1.77379	-1.72756	-1.91521	-1.9406	-1.84986	-2.13223	-1.78809	-2.05172	-2.15989	-1.93884	-2.47351	-1.66633	-2.12035	-1.70816	-1.49783	-1.81416	-1.93233	-1.97496	-2.00646	-1.75277	-1.8015	-1.93112	-1.82791	-1.87084	-1.81747	-2.14079	-1.90897	-2.34402	-1.95832	-2.1022	-2.07112	-2.18422	-1.77076	-1.15485	-1.12176	-1.40663	-1.54316	-2.05934	-2.47211	-1.70927
36R	-2.21883	-2.23585	-1.99874	-1.86218	-2.47621	-2.13954	-1.78915	-2.117	-2.23447	-1.69932	-1.69398	-1.95463	-2.01053	-1.93667	-2.15887	-1.78112	-2.02259	-2.10357	-1.90231	-2.29608	-1.66765	-2.11542	-1.68311	-1.49131	-1.83927	-1.89751	-1.94516	-1.93252	-1.75236	-1.78654	-1.91147	-1.81225	-1.84746	-1.78529	-2.12762	-1.86883	-2.27077	-1.95185	-2.10043	-2.03494	-2.15689	-1.76354	-1.16976	-1.14414	-1.42589	-1.56341	-2.04817	-2.46453	-1.79479
37R	-2.31004	-2.35138	-2.43938	-2.40842	-2.23389	-2.25709	-2.09113	-1.54178	-1.5718	-1.82371	-1.69697	-2.13892	-1.79744	-1.74109	-1.9386	-2.05883	-2.05598	-2.18717	-2.02288	-2.28279	-1.52488	-1.82342	-1.63433	-1.43122	-1.86457	-1.97857	-1.66424	-1.93802	-1.6561	-1.91229	-2.06351	-1.72928	-1.92784	-2.19192	-2.15468	-2.14346	-2.0722	-2.1751	-2.10898	-2.11271	-2.00687	-1.72102	-1.53279	-1.46567	-1.78319	-1.90143	-2.02032	-2.27727	-2.00909
38R	-2.31362	-2.14813	-2.35957	-1.9351	-2.04335	-1.42256	-1.69002	-2.07693	-1.93181	-1.61439	-1.62762	-1.55023	-2.0528	-2.17138	-2.72122	-1.6539	-2.19552	-1.84867	-1.82975	-1.80679	-1.76416	-2.08942	-1.89095	-2.79285	-3.28945	-1.81455	-1.84581	-1.75546	-1.74469	-2.08301	-2.25968	-2.37661	-1.7106	-2.46221	-2.21655	-1.7585	-2.0874	-1.76181	-1.7292	-2.02935	-1.71765	-1.68923	-1.86559	-1.66596	-1.905	-1.983	-2.29055	-1.8592	-1.89386
39R	-2.3472	-2.27469	-2.1821	-2.13629	-2.30859	-2.63242	-2.00052	-1.95044	-1.87404	-2.08233	-2.06325	-2.19064	-1.86715	-1.91419	-2.00608	-2.2553	-2.20386	-2.1986	-1.77359	-2.01048	-1.9444	-1.74305	-1.98092	-1.5819	-2.06146	-1.73481	-1.7329	-1.80617	-1.76643	-2.0133	-1.99007	-2.00866	-2.13105	-2.02726	-2.13418	-2.20905	-2.09526	-2.15619	-2.07962	-2.08242	-2.03463	-1.82261	-1.48314	-1.43007	-1.49595	-1.53718	-2.22944	-2.38274	-1.5259
40R	-2.15121	-2.13686	-2.43368	-2.48455	-2.05768	-2.52432	-2.21359	-2.14136	-1.97901	-1.97479	-1.84562	-2.18124	-1.8492	-1.83155	-1.92404	-2.114	-2.12236	-2.21331	-2.24948	-2.38694	-1.93778	-2.13294	-1.91035	-1.66927	-1.91806	-2.00353	-2.21882	-2.18582	-1.96599	-1.96576	-2.02552	-2.31239	-2.02637	-2.26598	-2.22422	-2.42157	-2.17536	-2.19985	-2.11682	-2.15739	-2.12313	-2.01765	-1.44308	-1.40886	-1.88059	-1.98425	-1.95142	-2.49258	-1.67297
41R	-2.2488	-2.2286	-2.2989	-2.40698	-2.2511	-2.82589	-1.84714	-1.77461	-1.97347	-2.04736	-1.66005	-2.00065	-1.84078	-1.78087	-1.96142	-1.88697	-1.9667	-1.73346	-1.64445	-2.36305	-1.52573	-1.71359	-1.46662	-1.52855	-1.9034	-1.82189	-1.57914	-1.59884	-1.67304	-1.83418	-2.07251	-1.65133	-1.8693	-1.68725	-1.97443	-1.69567	-1.87252	-2.07289	-2.11395	-2.18079	-2.11717	-1.52255	-1.56916	-1.58679	-1.8182	-1.88567	-2.31589	-2.5269	-1.79506
42R	-2.29603	-2.17486	-2.48021	-2.72958	-2.28708	-2.37561	-1.47025	-2.40972	-2.32721	-2.11418	-1.94739	-1.85934	-2.12344	-2.15595	-2.03075	-1.56313	-1.70925	-1.76189	-1.52256	-2.16866	-1.84268	-1.9081	-1.57858	-1.54645	-1.75284	-1.50769	-2.23852	-2.24705	-1.79374	-1.61509	-1.76608	-1.52798	-2.2759	-1.7692	-2.17103	-1.48357	-2.02658	-1.77762	-2.04659	-2.2701	-2.30283	-2.1284	-1.42548	-1.46724	-1.92715	-2.15719	-2.44715	-2.20907	-1.48104
43R	-2.47116	-2.40716	-2.6757	-2.52839	-2.1173	-1.79079	-1.61912	-2.4546	-2.46456	-1.83658	-1.69466	-1.62769	-2.17566	-2.30768	-2.32171	-1.47891	-1.88754	-1.41572	-1.42859	-1.87114	-1.54519	-2.2872	-1.42522	-1.75103	-2.51029	-1.59131	-2.52451	-2.09237	-1.60533	-1.72724	-2.00275	-1.73449	-1.85146	-1.80645	-1.86811	-1.38239	-1.67027	-1.70044	-1.84186	-2.0635	-2.03361	-1.95933	-1.77246	-1.73989	-1.87973	-2.09002	-2.45891	-2.01239	-1.55199
44R	-2.2378	-2.35506	-1.90834	-1.84177	-2.16748	-2.31967	-2.15052	-2.24633	-2.25638	-2.04322	-1.95033	-1.60278	-2.20317	-2.19804	-2.46144	-2.44822	-1.78639	-2.27923	-2.28793	-1.87975	-2.01845	-2.05743	-2.25954	-2.40451	-2.61762	-2.55063	-2.29101	-2.12001	-2.2683	-2.4368	-2.12291	-2.47644	-2.0868	-2.59464	-2.43923	-2.58348	-2.00757	-1.65314	-2.04226	-2.03993	-2.26309	-2.16345	-1.56544	-1.47749	-1.49626	-1.53293	-2.30352	-2.41228	-2.22571
45R	-2.27116	-2.33904	-1.93221	-1.73303	-2.25396	-1.86099	-1.68971	-2.21599	-2.12892	-1.82616	-1.81002	-1.44965	-2.34323	-2.13864	-2.67531	-1.80462	-1.76785	-2.25298	-2.56309	-2.28276	-1.95903	-2.3353	-1.99403	-2.6823	-2.79263	-2.13435	-2.26255	-2.19153	-2.02649	-2.11775	-2.11376	-2.54323	-1.94016	-2.64969	-2.24879	-2.02014	-2.15527	-1.53227	-2.03754	-1.90516	-1.90221	-1.93706	-1.45503	-1.50548	-1.4642	-1.50397	-2.20952	-2.36154	-2.04052
46R	-2.55611	-2.53307	-2.33377	-2.33012	-2.19457	-1.99168	-2.24974	-1.80558	-1.94282	-1.76344	-1.80448	-2.05867	-2.52868	-2.58763	-2.88258	-2.43039	-2.6701	-2.14743	-2.3219	-2.06683	-1.8198	-2.88822	-2.28432	-2.82407	-3.16004	-2.2409	-2.08033	-2.00992	-2.15421	-2.62296	-2.94347	-2.66838	-1.98786	-2.64445	-2.45457	-2.42098	-2.31885	-2.19259	-1.86421	-2.14249	-1.89479	-1.80394	-2.31471	-2.13438	-2.33477	-2.36354	-2.51099	-2.04618	-2.31229
47R	-2.08118	-1.99946	-2.06578	-2.15005	-1.92625	-1.78434	-1.95708	-2.06079	-1.99276	-1.6601	-1.68303	-1.77801	-2.15264	-2.31636	-2.51854	-1.97739	-2.22455	-1.78011	-1.67643	-1.83445	-1.69667	-1.9741	-1.88328	-2.6309	-3.07977	-1.68513	-1.67227	-1.74367	-1.68497	-2.16039	-2.28647	-2.46293	-1.78193	-2.71764	-2.14312	-2.0599	-1.9147	-2.01097	-1.76272	-1.69648	-1.75432	-1.72179	-2.04921	-1.84896	-2.19571	-2.25338	-2.45965	-1.94501	-2.00966
[truncated: 36 more columns]
